# Supplementary material for: Physician Use of Electronic Health Records: Survey Study Assessing Factors Associated With Provider Reported Satisfaction and Perceived Patient Impact
Source: PubMed Central journal article supplement (PMC6470463; doi:10.2196/10949), 2019-04-04
Supplement: medinform_v7i2e10949_app1.pdf [file medinform_v7i2e10949_app1.pdf]

Current Role: Resident/Fellow/Attending (circle)

Years in Current Role:

- PGY#:
- Years as attending:

How many years have you used the following (include years as a student, resident, fellow, attending)?

- Any EHR (Practice Partner, Epic, Oacis, Mckesson, etc):
- EPIC total (outside and at MUSC):
- EPIC at MUSC:

What "parts" of Epic do you use at MUSC (select all that apply)?

- Inpatient
- Outpatient
- ASAP (Emergency Department)
- Optime/Anesthesia (Operating room)
- Radiant (radiologists only)
- Stork (labor and delivery)
- Kaleidoscope (ophthalmology)
- Beacon (oncology)

How does Epic affect your patients overall?

\_\_\_\_\_

Extremely Negatively Extremely Positively

How does Epic affect you overall?

\_\_\_\_\_

Extremely Negatively Extremely Positively

Please rate your efficiency using Epic.

\_\_\_\_\_

Extremely Inefficient Extremely Efficient

Please rate your efficiency compared to your peers (those in the same specialty/subspecialty using Epic).

\_\_\_\_\_

Extremely Less Efficient Extremely More Efficient

|                                                              |  |
|--------------------------------------------------------------|--|
| Describe the most positive effect Epic has on your patients. |  |
| Describe the most negative effect Epic has on your patients. |  |
| Describe the most positive effect Epic has on you.           |  |
| Describe the most negative effect Epic has on you.           |  |
